# Supplementary material for: A pooled shRNA screen for regulators of primary mammary stem and progenitor cells identifies roles for Asap1 and Prox1
Source: Springer Nature journal article supplement (doi:10.1186/s12885-015-1187-z), 2015-04-02
Supplement: MOESM1 [file 9744162]

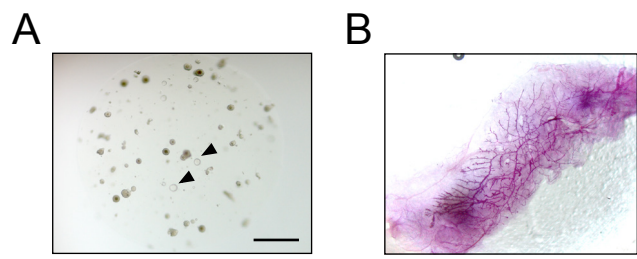

**C**

| Transplanted cell dose | Positive Outgrowths/Total | MRU Frequency (95% CI) |
|------------------------|---------------------------|------------------------|
| 10,000                 | 6/6                       | 1/298                  |
| 1,000                  | 5/5                       | (1/117-1/760)          |
| 200                    | 2/5                       |                        |
